# Supplementary material for: Rumen microbiome in dairy calves fed copper and grape-pomace dietary supplementations: Composition and predicted functional profile
Source: PubMed Central journal article supplement (PMC6264861; doi:10.1371/journal.pone.0205670), 2018-11-29
Supplement: pone.0205670.s002.pdf [file pone.0205670.s002.pdf]

# Functional profiling of the rumen microbiota in dairy calves fed copper and grape-pomace dietary supplementations

Filippo Biscarini<sup>1,2</sup> et al.\*,

**1** Institute for Biology and Biotechnology in Agriculture (IBBA), CNR, Milano, Italy

**2** School of Medicine, Cardiff University, Cardiff, United Kingdom

\*E-mail: gmartino@unite.it

| Ingredient %                     | Control | Grape.pomace | Copper |
|----------------------------------|---------|--------------|--------|
| Wheat meal                       | 14      | 19.99        | 14     |
| Corn meal                        | 12      | 19.3         | 12     |
| Corn                             | 10      | 10           | 10     |
| Chopped wheat                    | 10      | 8            | 10     |
| Sunflower meal                   | 10      | 4.1          | 10     |
| Bean                             | 7.5     | 8            | 7.5    |
| Scraps cookies                   | 5.35    | 5            | 5.35   |
| Barley meal                      | 5       | -            | 5      |
| Wheat bran                       | 5       | 5            | 5      |
| Corn distillers grain            | 5       | 1            | 5      |
| Barley                           | 3.7     | 2            | 3.7    |
| Citrus pulp                      | 3.5     | -            | 3.5    |
| Soybean meal                     | 2.95    | 1.4          | 2.95   |
| Sugarcane molasses               | 1       | 1            | 1      |
| Soybean hulls                    | 0.6     | 1            | 0.6    |
| Grape pomace                     | -       | 10           | -      |
| CaCO <sub>3</sub>                | 2.5     | 1.65         | 2.5    |
| NaCl 39%                         | 0.6     | 0.6          | 0.6    |
| NaHCO <sub>3</sub> 27%           | 0.5     | 0.8          | 0.5    |
| Soybean oil                      | 0.36    | -            | 0.36   |
| CaHPO <sub>4</sub> 17%           | -       | 0.61         | -      |
| Vitamins and minerals mix        | 0.44    | 0.55         | 0.44   |
| Nutrient composition, % DM basis |         |              |        |
| DM                               | 88.59   | 88.59        | 88.59  |
| CP                               | 15.99   | 15.81        | 15.99  |
| Fat                              | 3.75    | 4.52         | 3.75   |
| Fiber                            | 8.51    | 8.18         | 8.51   |
| NDF                              | 20.87   | 20.23        | 20.87  |
| Ash                              | 7.5     | 8.5          | 7.5    |
| Ca                               | 1.13    | 1.13         | 1.13   |
| P                                | 0.47    | 0.51         | 0.47   |
| NE (Mcal/kg)                     | 0.97    | 0.99         | 0.97   |

S2 Table: Ingredients and nutrient composition of the finishing diets fed to the three experimental groups (control, grape pomace and copper supplementation).
