# Supplementary material for: Rumen microbiome in dairy calves fed copper and grape-pomace dietary supplementations: Composition and predicted functional profile
Source: PubMed Central journal article supplement (PMC6264861; doi:10.1371/journal.pone.0205670), 2018-11-29
Supplement: pone.0205670.s003.pdf [file pone.0205670.s003.pdf]

# Functional profiling of the rumen microbiota in dairy calves fed copper and grape-pomace dietary supplementations

Filippo Biscarini<sup>1,2</sup> et al.\*,

**1** Institute for Biology and Biotechnology in Agriculture (IBBA), CNR, Milano, Italy

**2** School of Medicine, Cardiff University, Cardiff, United Kingdom

\*E-mail: gmartino@unite.it

| step                      | Phred3   | Phred19  |
|---------------------------|----------|----------|
| multiple_extract_barcodes | 16787720 | 16787720 |
| multiple_join_paired_ends | 8393698  | 8393698  |
| multiple_split_library    | 8206524  | 5620806  |
| closed_otupicking         | 4164028  | 4089545  |
| filter_otus               | 4141362  | 4058283  |

S3 Table: Number of 16S rRNA gene sequences retained after successive steps of the bioinformatics processing and filtering: comparison between two quality filtering thresholds (Phred<sub>3</sub>, default in the Qiime pipeline; Phred<sub>19</sub>, threshold used in this study).
