# Supplementary material for: Rumen microbiome in dairy calves fed copper and grape-pomace dietary supplementations: Composition and predicted functional profile
Source: PubMed Central journal article supplement (PMC6264861; doi:10.1371/journal.pone.0205670), 2018-11-29
Supplement: pone.0205670.s004.pdf [file pone.0205670.s004.pdf]

# Functional profiling of the rumen microbiota in dairy calves fed copper and grape-pomace dietary supplementations

Filippo Biscarini<sup>1,2</sup> et al.\*,

**1** Institute for Biology and Biotechnology in Agriculture (IBBA), CNR, Milano, Italy

**2** School of Medicine, Cardiff University, Cardiff, United Kingdom

\*E-mail: gmartino@unite.it

## APPENDIX 1: METATAXONOMICS PIPELINE COMMAND LINES

To process 16S rRNA gene sequencing data, the QIIME pipeline was used [1]. The specific steps and parameters used are detailed below.

### Joining paired-end reads

Paired-end reads were joined into single FASTQ files per sample:

```
multiple_join_paired_ends.py --input_dir=<sample_path> --output_dir=./ --include_input_dir_path
--parameter_fp=$PWD/qiime_parameters --read1_indicator _R1 --read2_indicator _R2
```

The method “SeqPrep” for the joining of paired-end reads (<https://github.com/jstjohn/SeqPrep>) was selected via the parameter file (qiime\_parameters):

```
join_paired_ends:pe_join_method      SeqPrep
```

### Quality filtering

Joined reads were then filtered for quality and saved into a unique FASTA file for all samples:

```
multiple_split_libraries_fastq.py --demultiplexing_method sampleid_by_file
--input_dir=<multiple_join_paired_ends/> --output_dir=./
--include_input_dir_path --remove_filepath_in_name
--parameter_fp=$PWD/qiime_parameters
```

Quality filter parameter were specified via the parameter file (qiime\_parameters):

```
split_libraries_fastq:max_bad_run_length      3 >> ./qiime_parameters
split_libraries_fastq:min_per_read_length_fraction  0.75 >> ./qiime_parameters
split_libraries_fastq:sequence_max_n  0 >> ./qiime_parameters
split_libraries_fastq:phred_quality_threshold  19 >> ./qiime_parameters
```

### OTU picking

OTUs were determined by aligning quality-filtered reads against the QIIME-compatible SILVA reference FASTA file, release 123, with minimum 97% clustering (<https://www.arb-silva.de/download/archive/qiime/>):

```
pick_closed_reference_otus.py
--reference_fp SILVA123_QIIME/rep_set/rep_set_all/97/97_otus.fasta
--taxonomy_fp SILVA123_QIIME/taxonomy/taxonomy_all/97/raw_taxonomy.txt
--parallel --jobs_to_start=32 --force
--input_fp=<multiple_split_library/>seqs.fna --output_dir=./
```

### Filter OTUs

OTUs were filtered by total count across samples greater than 15 of the number of OTUs in at least 2 samples:

```
filter_otus_from_otu_table.py -i <closed_otupicking/>otu_table.biom -n 15 -s 2
-o ./otu_table_filtered.biom
```

## Normalization of OTU counts

To account for uneven sequencing, OTU counts were normalized by cumulative sum scaling (CSS, [2]):

```
normalize_table.py -i <filter_otus/>otu_table_filtered.biom -a CSS -o CSS_normalized_otu_table.biom
```

## Alpha diversity

Alpha diversity indexes were estimated from the filtered OTU table:

```
alpha_diversity.py -i <filter_otus/>otu_table_filtered.biom  
-m chao1,ace,fisher_alpha,observed_otus,observed_species,shannon,simpson  
-o ./alpha.txt -t SILVA123_QIIME/trees/97/97_otus.tre
```

## Beta diversity

Beta diversity was estimated from the filtered and normalized OTU table:

```
beta_diversity.py -i <normalize_otu/>CSS_normalized_otu_table.biom -m bray_curtis  
-o ./ -t SILVA123_QIIME/trees/97/97_otus.tre
```

## Sequence-based rarefaction

To check whether sequencing depth was adequate, sequence-based rarefaction curves were generated from the unfiltered OTU table:

```
alpha_rarefaction.py -i <closed_otupicking/>otu_table.biom -m metadatamapping.csv  
-o ./ --force --parameter=$PWD/qiime_parameters --parallel  
--jobs_to_start=32 --max_rare_depth 218850 --min_rare_depth 100
```

Where metadatamapping.csv is the metadata file (feed supplementation treatments), and max\_rare\_depth is the median sequence counts per sample. Additional parameters were specified via the parameter file (qiime\_parameters):

```
Alpha_diversity:metrics observed_otus,chao1,observed_species,shannon,simpson,  
goods_coverage,ace,fisher_alpha >> ./qiime_parameters  
make_rarefaction_plots:resolution 800 >> ./qiime_parameters
```

## References

- [1] Caporaso J, Kuczynski J, Stombaugh J, , others Bittinger, K,Caporaso, J G , Kuczynski, J , Stombaugh, J , Bittinger, K , Bushman, F D , Costello, E K , Fierer, N , Peña, A G , Goodrich, J K , Gordon, J I , Huttley GA. QIIME allows analysis of high-throughput community sequencing data. Nature. 2010;7:335–336. doi:10.1038/nmeth.f.303.
- [2] Paulson JN, Stine OC, Bravo HC, Pop M. Differential abundance analysis for microbial marker-gene surveys. Nature methods. 2013;10(12):1200–2. doi:10.1038/nmeth.2658.
