# Supplementary material for: Rumen microbiome in dairy calves fed copper and grape-pomace dietary supplementations: Composition and predicted functional profile
Source: PubMed Central journal article supplement (PMC6264861; doi:10.1371/journal.pone.0205670), 2018-11-29
Supplement: pone.0205670.s005.pdf [file pone.0205670.s005.pdf]

# Functional profiling of the rumen microbiota in dairy calves fed copper and grape-pomace dietary supplementations

Filippo Biscarini<sup>1,2</sup> et al.\*,

**1** Institute for Biology and Biotechnology in Agriculture (IBBA), CNR, Milano, Italy

**2** School of Medicine, Cardiff University, Cardiff, United Kingdom

\*E-mail: gmartino@unite.it

## APPENDIX 2: ALPHA-AND BETA-DIVERSITY INDEXES

### Alpha diversity

**Richness indexes** : The Chao1 and Abundance-based Coverage Estimator (ACE) richness indexes were calculated as described by Chao and colleagues [1, 2, 3]:

$$\text{Chao1} = S_{obs} + \frac{F_1(F_1 - 1)}{2(F_2 + 1)} \quad (1)$$

where  $S_{obs}$  is the observed number of species, and  $F_1$  and  $F_2$  are the numbers of singletons (only one count) and doubletons (exactly two counts), respectively, in each sample.

And for the ACE:

$$S_{ACE} = S_{abund} + \frac{S_{rare}}{C_{ACE}} + \frac{F_1}{C_{ACE}} + \gamma_{ACE}^2 \quad (2)$$

where:  $S_{abund}$  and  $S_{rare}$  are the numbers of abundant and rare OTUs, with respect to a threshold of individuals in which OTUs are observed (3 in this study);  $C_{ACE}$  is the sample abundance coverage estimator obtained by  $1 - \frac{F_1}{N_{rare}}$ , with  $F_1$  the frequency of singletons and  $N_{rare} = \sum_{k=1}^j F_k$ , for  $j = 3$  the threshold for rare OTUs;  $\gamma_{ACE}^2$  is the coefficient of variation for OTU relative abundances:

$$\gamma_{ACE}^2 = \max \left[ \frac{S_{rare}}{C_{rare}} \cdot \frac{\sum_{k=1}^j k(1-k)F_k}{(N_{rare})(N_{rare} - 1)} - 1, 0 \right] \quad (3)$$

**Diversity indexes** : The Shannon index was obtained from [4]:

$$H' = - \sum_{i=1}^S (p_i \cdot \ln(p_i)) \quad (4)$$

where  $p_i$  is the relative abundance of each OTU.

Similarly, the Simpson index was also based on OTUs relative abundances [5]:

$$D = 1 - \sum_{i=1}^S p_i^2 \quad (5)$$

Fisher's alpha [6] was estimated by solving numerically for alpha (Brent's algorithm [7] the following inverse Lambert-W function [8]:

$$S = \alpha \cdot \log \left( 1 + \frac{N}{\alpha} \right) \quad (6)$$

where  $S$  is the number of OTUs and  $N$  is the number of individuals in the sample ( $\log()$  is the natural logarithm).

**Evenness indexes** : Simpson's evenness measure  $E$  was calculated as:

$$E = \frac{1/D}{S_{obs}} \quad (7)$$

where  $D$  is the Simpsons's diversity from Equation 4 and  $S_{obs}$  is the observed number of species [9].

Pielou's  $J'$  index (a.k.a. Shannon's evenness) was obtained from the Shannon index (Equation 3) divided by the natural logarithm of the number of species [9, 10]:

$$J' = \frac{H'}{\ln(S)} \quad (8)$$

## Beta diversity

The across-sample rumen microbiota diversity was quantified by calculating Bray-Curtis dissimilarities [11]:

$$BC_{ij} = \frac{S_i + S_j - 2C_{ij}}{S_i + S_j} \quad (9)$$

Where  $S_i$  and  $S_j$  are the number of species in samples  $i$  and  $j$ , and  $C_{ij}$  is the number of species in common between the two samples (if there are no species in common, the numerator is equal to the denominator and the dissimilarity is one -maximum; if all species are in common, the dissimilarity is zero -minimum).

## References

- [1] Chao A. Nonparametric Estimation of the Number of Classes in a Population Author. *Scandinavian Journal of Statistics*. 1984;11(4):265–270. doi:10.1214/aoms/1177729949.
- [2] Chao A, Lee SM. Estimating the Number of Classes via Sample Coverage. *Journal of the American Statistical Association*. 1992;87(417):210. doi:10.2307/2290471.
- [3] Chao A, Ma MC, Yang MCK. Stopping rule and estimation for recapture debugging with unequal detection rates. *Biometrika*. 1993;80(1):193–201. doi:10.1093/biomet/80.1.193.
- [4] Shannon C. A Mathematical Theory of Communication, *The Bell System Technical Journal*. The Bell System Technical Journal. 1948; p. 379–427.
- [5] Simpson EH. Measurement of diversity. *Nature*. 1949;163:688. doi:10.1038/163688a0.
- [6] Fisher RA, Corbet AS, Williams CB. The Relation Between the Number of Species and the Number of Individuals in a Random Sample of an Animal Population. *The Journal of Animal Ecology*. 1943;12(1):42–58. doi:10.2307/1411.
- [7] Brent RP. An algorithm with guaranteed convergence for finding a zero of a function. *The Computer Journal*. 1971;14(4):422–425. doi:10.1038/nmeth.f.303.
- [8] Euler L. De serie Lambertina plurimisque eius insignibus proprietatibus. *Acta Acad. Scient. Petropol*. 1783;2:29–51. doi:10.1038/nmeth.f.303.
- [9] Smith B, Wilson JB. A consumer's guide to evenness indices. *Oikos*. 1996;70–82.
- [10] Pielou EC. *Ecological diversity*. John Wiley and Sons, New York. 1975.
- [11] Bray JR, Curtis JT. An ordination of the upland forest communities of Southern Wisconsin. *Ecol Monographs*. 1957;27(4):325–349.
