# Supplementary material for: Rumen microbiome in dairy calves fed copper and grape-pomace dietary supplementations: Composition and predicted functional profile
Source: PLoS One. 2018 Nov 29;13(11):e0205670. doi: 10.1371/journal.pone.0205670 (PMC6264861; doi:10.1371/journal.pone.0205670)
Supplement: S1 Table — Ingredients and nutrient composition of the custom-formulated concentrate, which was fed to all calves prior to the feed supplementation experiment. (PDF) [file pone.0205670.s001.pdf]

# Functional profiling of the rumen microbiota in dairy calves fed copper and grape-pomace dietary supplementations

Filippo Biscarini<sup>1,2</sup> et al.\*,

**1** Institute for Biology and Biotechnology in Agriculture (IBBA), CNR, Milano, Italy

**2** School of Medicine, Cardiff University, Cardiff, United Kingdom

\*E-mail: gmartino@unite.it

| Ingredient                | %     |
|---------------------------|-------|
| Wheat meal                | 41.99 |
| Corn meal                 | 9.00  |
| Barley                    | 9.00  |
| Chopped wheat             | 8.00  |
| Sunflower meal 30%        | 7.80  |
| Wheat bran                | 5.00  |
| Scraps cookies            | 4.00  |
| Corn                      | 3.66  |
| Sunflower meal 36%        | 3.00  |
| Betamel                   | 1.50  |
| Soybean meal 44%          | 1.50  |
| Sugarcane molasses        | 1.50  |
| Soybean meal 47%          | 0.84  |
| CaCO <sub>3</sub>         | 3.00  |
| NaCl 39%                  | 0.80  |
| Vitamins and minerals mix | 0.40  |

  

| Nutrient composition, % DM basis |       |
|----------------------------------|-------|
| DM                               | 88.05 |
| CP                               | 14.16 |
| Fat                              | 3.32  |
| Fiber                            | 7.54  |
| NDF                              | 18.49 |
| Ash                              | 6.64  |
| Ca                               | 1.00  |
| P                                | 0.42  |
| NE (Mcal/kg)                     | 0.89  |

S1 Table: Ingredients and nutrient composition of the custom-formulated concentrate, which was fed to all calves prior to the feed supplementation experiment. DM: dry matter; CP: crude protein; NDF: neutral-detergent fiber; NE: net energy
